# Supplementary material for: A stand-alone cobalt bis(dicarbollide) photoredox catalyst epoxidates alkenes in water at extremely low catalyst load
Source: Royal Society of Chemistry journal article supplement (doi:10.1039/d1gc03119h), 2021-01-01

## SUPPORTING INFORMATION

# **A Stand-Alone Cobalt bis(dicarbollide) Photoredox Catalyst Epoxidates Alkenes in Water at Extremely Low Catalyst Load**

Isabel Guerrero,<sup>a,b</sup> Clara Viñas,<sup>a</sup> Isabel Romero,<sup>b\*</sup> Francesc Teixidor<sup>a\*</sup>

<sup>a</sup>Institut de Ciència de Materials de Barcelona, ICMA-B-CSIC, Campus UAB, E-08193 Bellaterra, Spain.

<sup>b</sup>Departament de Química and Serveis Tècnics de Recerca, Universitat de Girona, C/ M. Aurèlia Campmany, 69, E-17003 Girona, Spain.

## TABLE OF CONTENT

**Table S1.** Photooxidation tests performed with **Na[1]** complex. Conditions: **Na[1]** (0.02 mM), alkene (20 mM),  $\text{Na}_2\text{S}_2\text{O}_8$  (26 mM), 5 mL of a 0.4  $\mu\text{M}$  in  $\text{K}_2\text{CO}_3$  solution at  $\text{pH}=7$ . UV irradiation (2.2 W,  $\lambda$  300 nm, 12 lamps in the walls of a box)

**Table S2.** Photooxidation of epoxides performed with **Na[1]** complex. Conditions: **Na[1]** (0.02 mM), epoxide (20 mM),  $\text{Na}_2\text{S}_2\text{O}_8$  (26 mM), 5 mL of a 0.4  $\mu\text{M}$  in  $\text{K}_2\text{CO}_3$  solution at  $\text{pH}=7$ . UV irradiation (2.2 W,  $\lambda$  300 nm, 12 lamps in the walls of a box)

**Table S3.** Photooxidation tests performed with **Na[1]** and  $[\text{Ru}(\text{bpy})_3]^{2+}$  complexes. Conditions: **Na[1]** or  $[\text{Ru}(\text{bpy})_3]^{2+}$  (0.02 mM), substrate (20 mM),  $\text{Na}_2\text{S}_2\text{O}_8$  (26 mM), 5 mL of a 0.4  $\mu\text{M}$  in  $\text{K}_2\text{CO}_3$  solution at  $\text{pH}=7$ . Ratio 1:1000:1300. After 30 min of reaction. UV irradiation (2.2 W,  $\lambda$  300 nm, 12 lamps in the walls of a box)

**Figure S1.** Plot of conversion as a function of time for the photoredox catalysis of styrene. Conditions:  $\text{Na}[3,3'\text{-Co}(1,2\text{-C}_2\text{B}_9\text{H}_{11})_2]$  (0.02 mM), styrene (20 mM),  $\text{Na}_2\text{S}_2\text{O}_8$  (26 mM), 5 mL of water (0.4  $\mu\text{M}$  in  $\text{K}_2\text{CO}_3$  solution at  $\text{pH}=7$ ), light irradiation (2.2 W,  $\lambda$  300 nm, 12 lamps in the walls of a box)

**Figure S2.** Plot of TON of styrene as a function of pH. Conditions:  $\text{Na}[3,3'\text{-Co}(1,2\text{-C}_2\text{B}_9\text{H}_{11})_2]$  (0.02 mM), styrene (20 mM),  $\text{Na}_2\text{S}_2\text{O}_8$  (26 mM), 5 mL of water, light irradiation (2.2 W,  $\lambda$  300 nm, 12 lamps in the walls of a box)

**Figure S3.** HPLC/ESI-MS resulting of the photooxidation of methyl oleate by **Na[1]** in water.

**Table S1.** Photooxidation tests performed with **Na[1]** complex. Conditions: **Na[1]** (0.02 mM), alkene (20 mM), Na<sub>2</sub>S<sub>2</sub>O<sub>8</sub> (26 mM), 5 mL of a 0.4 μM in K<sub>2</sub>CO<sub>3</sub> solution at pH=7. UV irradiation (2.2 W, λ 300 nm, 12 lamps in the walls of a box)

| Entry | substrate                                                                           | Conv.%             | Yield(select.)%                                                                     | Yield(select.)%                                       | Yield(select.)%                                                                       | Yield(select.)%       | Other products | Yield(select.)%                     |
|-------|-------------------------------------------------------------------------------------|--------------------|-------------------------------------------------------------------------------------|-------------------------------------------------------|---------------------------------------------------------------------------------------|-----------------------|----------------|-------------------------------------|
| 1     | 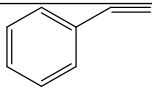   | 78 <sup>[a]</sup>  |    | 37(47) <sup>[a]</sup>                                 |     | 23(29) <sup>[a]</sup> | Other products | 18(23) <sup>[a]1</sup>              |
|       |                                                                                     | 80 <sup>[b]</sup>  |                                                                                     | 27(34) <sup>[b]</sup>                                 |                                                                                       | 35(44) <sup>[b]</sup> |                | 18(23) <sup>[b]1</sup>              |
|       |                                                                                     | 96 <sup>[c]</sup>  |                                                                                     | 25(26) <sup>[c]</sup>                                 |                                                                                       | 50(52) <sup>[c]</sup> |                | 21(22) <sup>[c]1</sup>              |
| 2     |    | 91 <sup>[b]</sup>  |    | 47(47) <sup>[b]</sup>                                 |     | 53(58) <sup>[b]</sup> |                |                                     |
|       |                                                                                     | ≥99 <sup>[c]</sup> |                                                                                     | 38(42) <sup>[c]</sup>                                 |                                                                                       | 53(53) <sup>[c]</sup> |                |                                     |
| 3     |    | 85 <sup>[b]</sup>  |    | 44(52) <sup>[b]</sup>                                 |     | 41(48) <sup>[b]</sup> |                |                                     |
|       |                                                                                     | 91 <sup>[c]</sup>  |                                                                                     | 20(22) <sup>[c]</sup>                                 |                                                                                       | 71(78) <sup>[c]</sup> |                |                                     |
| 4     |  | 66 <sup>[b]</sup>  |  | 39(44) <sup>[b]</sup>                                 |   | 37(56) <sup>[b]</sup> |                |                                     |
|       |                                                                                     | 95 <sup>[c]</sup>  |                                                                                     | 29(41) <sup>[c]</sup>                                 |                                                                                       | 56(59) <sup>[c]</sup> |                |                                     |
| 5     |  | 92 <sup>[b]</sup>  |  | 75[73/2, cis/trans](82 <sup>1</sup> ) <sup>[b]</sup>  |  |                       | Other products | 17(19) <sup>[b]</sup>               |
|       |                                                                                     | ≥99 <sup>[c]</sup> |                                                                                     | 33[16/17, cis/trans](33 <sup>1</sup> ) <sup>[c]</sup> |                                                                                       |                       |                | 67(67) <sup>[c]</sup>               |
| 6     |  | 97 <sup>[b]</sup>  |  | 70(72) <sup>[b]</sup>                                 |   | 8(8) <sup>[b]</sup>   | Other products | 19 <sup>2</sup> (19) <sup>[b]</sup> |
|       |                                                                                     | ≥99 <sup>[c]</sup> |                                                                                     | 37(37) <sup>[c]</sup>                                 |                                                                                       | 6(6) <sup>[c]</sup>   |                | 57 <sup>2</sup> (57) <sup>[c]</sup> |
| 7     |  | 81 <sup>[b]</sup>  |  | 58(72) <sup>[b]</sup>                                 |   | 9(11) <sup>[b]</sup>  | Other products | 14 <sup>3</sup> (17) <sup>[b]</sup> |
|       |                                                                                     | ≥99 <sup>[c]</sup> |                                                                                     | 16(16) <sup>[c]</sup>                                 |                                                                                       | 44(44) <sup>[c]</sup> |                | 39 <sup>3</sup> (39) <sup>[c]</sup> |

Ratio 1:1000:1300: <sup>[a]</sup> 5 min of reaction <sup>[b]</sup> 15 min of reaction, <sup>[c]</sup> 30 min of reaction, <sup>[d]</sup> 60 min of reaction. <sup>1</sup>selectivity with respect the overall epoxide produced. <sup>2</sup>yield with diol and benzoic acid from vinyl produced. <sup>3</sup>octanal and octanoic produced.

**Table S2.** Photooxidation of epoxides performed with **Na[1]** complex. Conditions: **Na[1]** (0.02 mM), epoxide (20 mM),  $\text{Na}_2\text{S}_2\text{O}_8$  (26 mM), 5 mL of a 0.4  $\mu\text{M}$  in  $\text{K}_2\text{CO}_3$  solution at pH=7. UV irradiation (2.2 W,  $\lambda = 300$  nm, 12 lamps in the walls of a box)

| Entry | substrate                                                                           | Conv.%                   |                                                                                      | product                                                                             |                                        |
|-------|-------------------------------------------------------------------------------------|--------------------------|--------------------------------------------------------------------------------------|-------------------------------------------------------------------------------------|----------------------------------------|
|       |                                                                                     | <b>Na[1]</b>             | <b>[Ru(bpy)<sub>3</sub>]<sup>2+</sup></b>                                            |                                                                                     |                                        |
| Entry | substrate                                                                           | Conv.%                   | Product                                                                              | Yield(select.)%                                                                     |                                        |
| 1     | 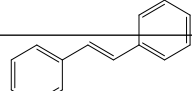   | 95                       | 10                                                                                   |  | 70(82) <sup>[a]</sup>                  |
| 1     |    | 85 <sup>[a]</sup>        |    |                                                                                     |                                        |
| 2     |    | $\geq 99$ <sup>[b]</sup> | 3                                                                                    |  | 60(60) <sup>[b]</sup>                  |
| 2     |    | 90 <sup>[a]</sup>        |    |                                                                                     | 67(74) <sup>[b]</sup>                  |
| 3     |    | $\geq 99$ <sup>[c]</sup> |                                                                                      |                                                                                     | 80(80) <sup>[c]</sup>                  |
| 3     |  | 70 <sup>[b]</sup>        |  |                                                                                     | 70( $\geq 99$ ) <sup>[b]</sup>         |
|       |                                                                                     | $\geq 99$ <sup>[c]</sup> |                                                                                      |                                                                                     | $\geq 99$ ( $\geq 99$ ) <sup>[c]</sup> |

Ratio 1:1000:1300: <sup>[a]</sup>15 min of reaction <sup>[b]</sup>30 min of reaction. Yield and selectivity with respect the overall diol produced.

**Table S3.**  
performed with  
complexes.

---

|          |                                                                                   |                 |       |                                                                                     |                                                                           |
|----------|-----------------------------------------------------------------------------------|-----------------|-------|-------------------------------------------------------------------------------------|---------------------------------------------------------------------------|
| <b>4</b> |  | $\geq 99^{[c]}$ | $< 1$ |  | Photooxidation tests<br><b>Na[1]</b> and $[\text{Ru}(\text{bpy})_3]^{2+}$ |
|----------|-----------------------------------------------------------------------------------|-----------------|-------|-------------------------------------------------------------------------------------|---------------------------------------------------------------------------|

---

Conditions: **Na[1]** or  $[\text{Ru}(\text{bpy})_3]^{2+}$  (0.02 mM), substrate (20 mM),  $\text{Na}_2\text{S}_2\text{O}_8$  (26 mM), 5 mL of a 0.4  $\mu\text{M}$  in  $\text{K}_2\text{CO}_3$  solution at pH=7. Ratio 1:1000:1300. After 30 min of reaction. UV irradiation (2.2 W,  $\lambda$  300 nm, 12 lamps in the walls of a box)

**Figure S1.** Plot of conversion as a function of time for the photoredox catalysis of styrene. Conditions: Na[3,3'-Co(1,2-C<sub>2</sub>B<sub>9</sub>H<sub>11</sub>)<sub>2</sub>] (0.02 mM), styrene (20 mM), Na<sub>2</sub>S<sub>2</sub>O<sub>8</sub> (26 mM), 5 mL of water (0.4 μM in K<sub>2</sub>CO<sub>3</sub> solution at pH=7), light irradiation (2.2 W, λ 300 nm, 12 lamps in the walls of a box)

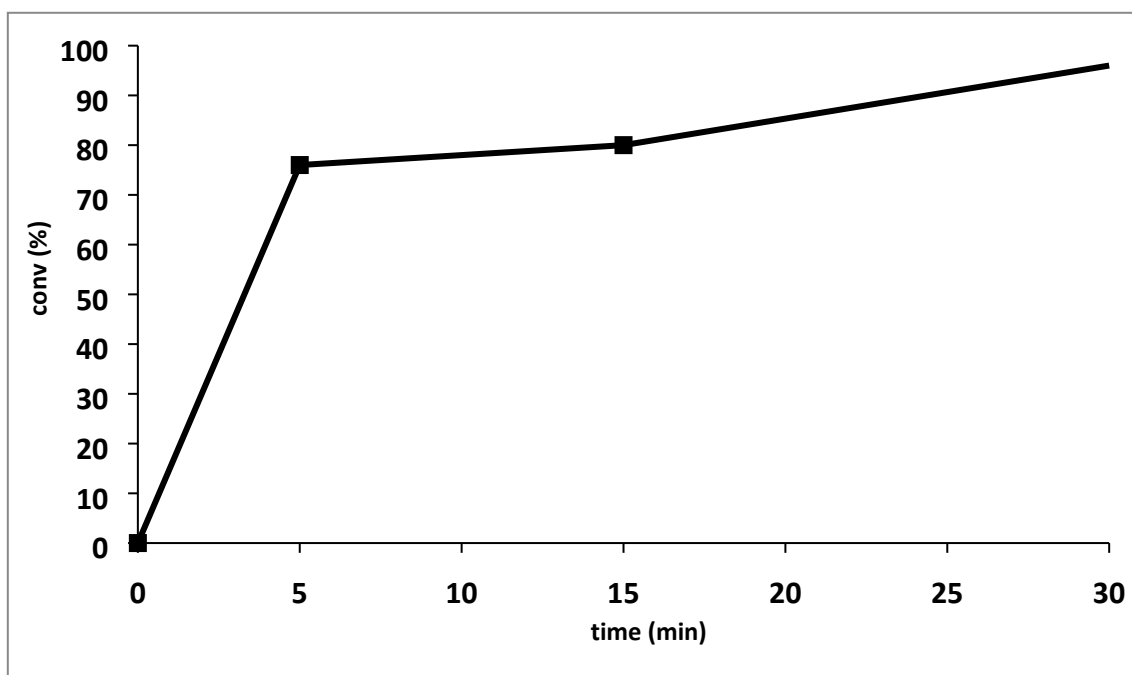

**Figure S2.** Plot of TON of styrene as a function of pH. Conditions: Na[3,3'-Co(1,2-C<sub>2</sub>B<sub>9</sub>H<sub>11</sub>)<sub>2</sub>] (0.02 mM), styrene (20 mM), Na<sub>2</sub>S<sub>2</sub>O<sub>8</sub> (26 mM), 5 mL of water, light irradiation (2.2 W,  $\lambda$  300 nm, 12 lamps in the walls of a box)

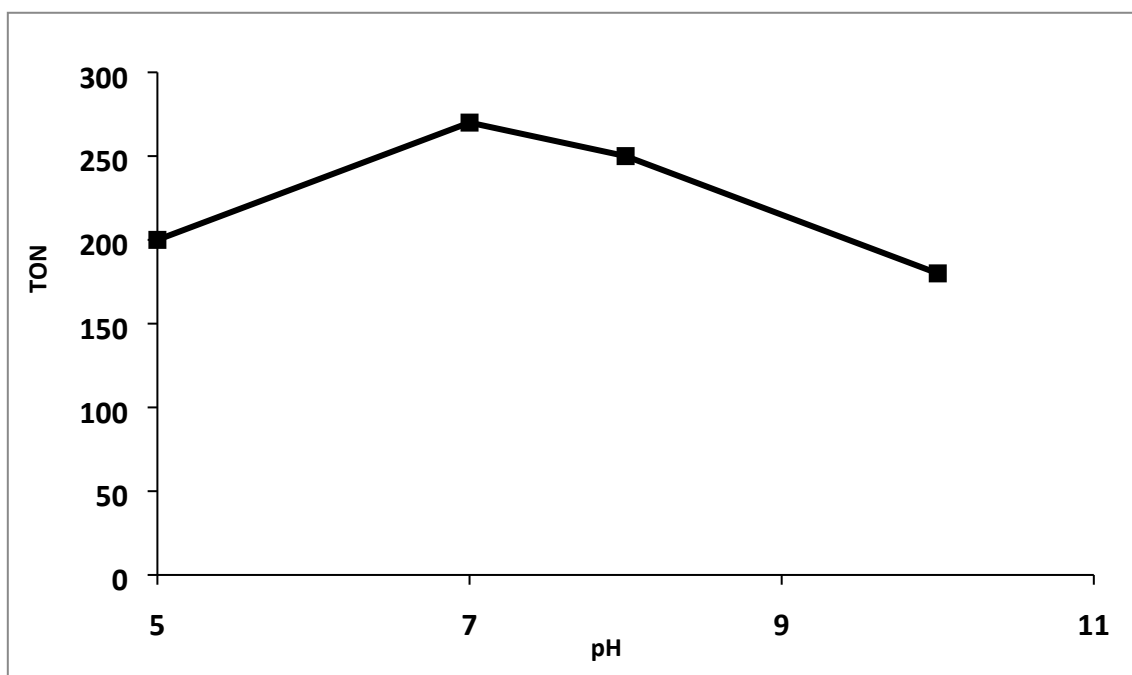

**Figure S3.** HPLC/ESI-MS resulting of the photooxidation of methyl oleate by **Na[1]** in water.

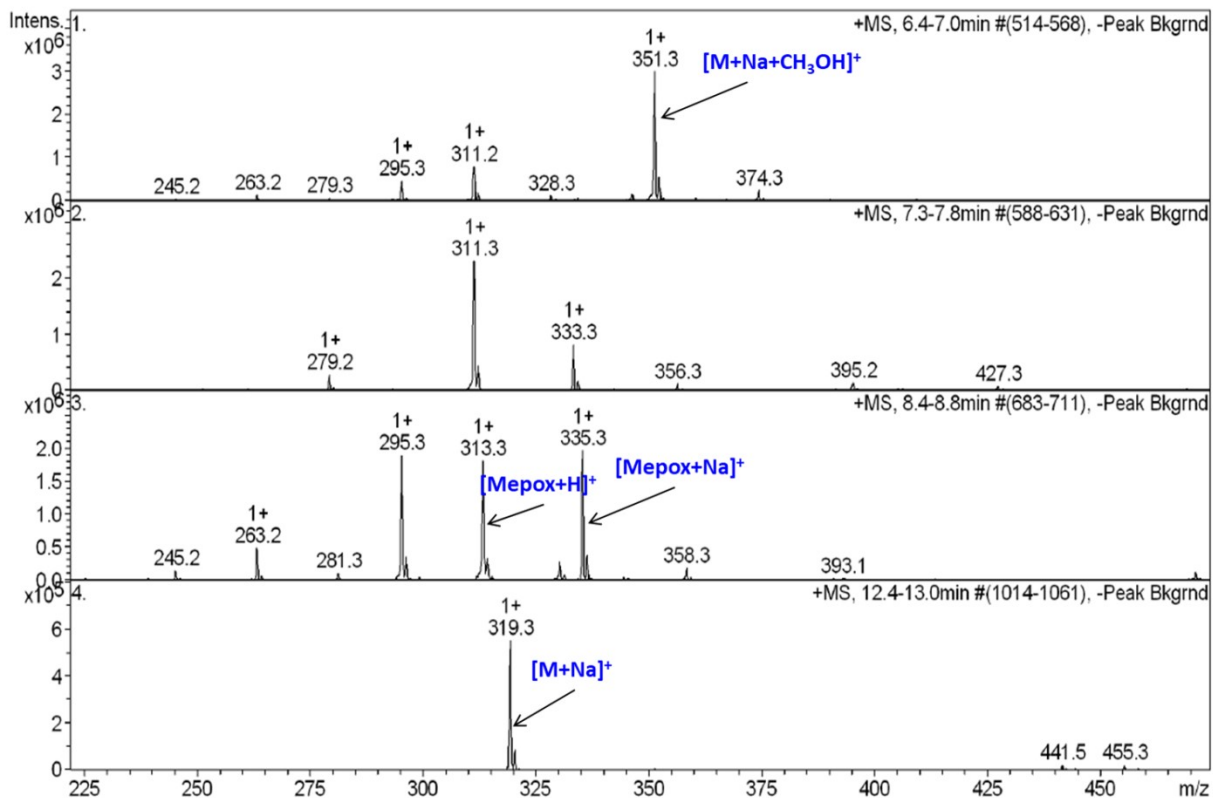

Supplement: d1gc03119h1.pdf [file d1gc03119h1.pdf]
